# Supplementary material
Source: publisher site journal article supplement (https://www.dovepress.com/article/567490)
Supplement: Supplementary file 1 [file Supplementary%20Table%201.docx]

| Supplementary Table 1 A comparison of the clinical characteristics of training and validation cohorts | | | | |
| --- | --- | --- | --- | --- |
| Clinical characteristics | Validation cohort (N=124) | Training cohort (N=299) | χ2/t/Z | *P*-value |
| Age (years old) | 64.0 (51.3, 76.0) | 65.0 (52.0, 78.0) | -0.944 | 0.345 |
| male (n, %) | 77 (62.1) | 181 (60.5) | 0.090 | 0.764 |
| Disease severity score |  |  |  |  |
| SOFA (score) | 6.0 (3.0, 13.0) | 5.0 (3.0, 11.0) | -0.398 | 0.691 |
| APACHE-II (score) | 13.5 (9.0, 18.0) | 12.0 (9.0, 17.0) | -1.396 | 0.163 |
| GCS (score) | 15.0 (14.0, 15.0) | 15.0 (14.0, 15.0) | -0.592 | 0.554 |
| Comorbidity (n, %) |  |  |  |  |
| Hypertension | 48 (38.7) | 157 (52.5) | 6.682 | 0.010 |
| Diabetes | 42 (33.9) | 92 (30.8) | 0.390 | 0.532 |
| Coronary heart disease | 20 (16.1) | 36 (12.0) | 1.276 | 0.259 |
| Chronic pulmonary disease | 9 (7.3) | 23 (7.7) | 0.024 | 0.878 |
| Autoimmune diseases | 2 (1.6) | 9 (3.0) | 0.675 | 0.411 |
| Infection site (n, %) |  |  |  |  |
| Respiratory tract | 87 (70.2) | 200 (66.9) | 0.430 | 0.512 |
| Abdominal cavity | 25 (20.2) | 58 (19.4) | 0.032 | 0.857 |
| Urinary tract | 5 (4.0) | 21 (7.0) | 1.359 | 0.244 |
| Others | 4 (3.2) | 9 (3.0) | 0.014 | 0.907 |
| MV (n, %) | 21 (16.9) | 50 (16.7) | 0.003 | 0.957 |
| Vital signs |  |  |  |  |
| Temperature (℃) | 38.6 (38.0, 39.0) | 38.6 (38.0, 38.9) | -0.161 | 0.872 |
| MAP (mmHg) | 78.0 (63.3, 89.0) | 79.0 (66.0, 88.0) | -0.899 | 0.369 |
| Heart rate (times/min) | 115.0 (94.3, 125.5) | 109.0 (96.0, 126.0) | -0.935 | 0.350 |
| Respiratory rate (times/min) | 26.0 (25.0, 28.8) | 26.0 (25.0, 28.0) | -0.045 | 0.964 |
| Blood gas analysis |  |  |  |  |
| pH | 7.43 (7.36, 7.47) | 7.44 (7.38, 7.48) | -1.993 | 0.046 |
| PaCO2 (mmHg) | 28.0 (23.9, 32.0) | 27.0 (23.0, 32.0) | -0.823 | 0.410 |
| PaO2 (mmHg) | 88.0 (74.0, 118.8) | 87.0 (73.0, 118.0) | -0.391 | 0.696 |
| Oxygenation Index | 350.5 (246.5, 451.3) | 319.0 (233.0, 424.0) | -1.350 | 0.177 |
| SBE | -5.0 (-10.0, -1.0) | -4.5 (-8.7, -1.3) | -0.734 | 0.463 |
| K+ (mmol/L) | 3.8 (3.5, 4.5) | 3.6 (3.3, 4.1) | -3.012 | 0.003 |
| Na+ (mmol/L) | 134.1 (128.8, 137.8) | 133.5 (130.2, 137.5) | -0.300 | 0.764 |
| Ca2+ (mmol/L) | 2.0 (1.9, 2.2) | 2.1 (1.9, 2.2) | -1.195 | 0.232 |
| Mg2+ (mmol/L) | 0.9 (0.8, 1.0) | 0.8 (0.8, 1.0) | -2.147 | 0.032 |
| Glucose (mmol/L) | 7.9 (6.3, 11.1) | 7.7 (6.1, 10.6) | -0.509 | 0.611 |
| Lactic acid (mmol/L) | 2.4 (1.5, 3.6) | 2.2 (1.6, 3.2) | -0.873 | 0.383 |
| BUN (mg/dl) | 9.1 (7.0, 16.4) | 8.7 (5.9, 15.9) | -1.118 | 0.263 |
| Creatinine (μmol/L) | 96.9 (63.7, 217.4) | 98.3 (64.4, 199.5) | -0.203 | 0.839 |
| Albumin (g/ml) | 33.5±5.7 | 32.9±5.9 | 0.967 | 0.334 |
| Complete blood count |  |  |  |  |
| WBC (103/mm3) | 13.0 (9.1, 17.5) | 10.8 (7.7, 16.2) | -2.477 | 0.013 |
| ANC (103/mm3) | 11.1 (7.3, 15.4) | 9.3 (6.4, 13.7) | -2.127 | 0.033 |
| ALC (103/mm3) | 0.8 (0.5, 1.4) | 0.7 (0.4, 1.2) | -1.247 | 0.212 |
| AMC (103/mm3) | 0.7 (0.4, 1.2) | 0.7 (0.3, 1.0) | -1.703 | 0.089 |
| RBC (103/mm3) | 4.0 (3.2, 4.5) | 4.0 (3.4, 4.6) | -0.640 | 0.522 |
| Hemoglobin(g/L) | 121.5 (90.0, 134.0) | 120.0 (99.0, 140.0) | -1.052 | 0.293 |
| Platelet (103/mm3) | 174.5 (86.3, 259.8) | 169.0 (112.0, 227.0) | -0.208 | 0.835 |
| Coagulation parameters |  |  |  |  |
| Fibrinogen (µg/mL) | 4.5 (3.4, 5.7) | 4.5 (3.5, 5.6) | -0.317 | 0.751 |
| PT (s) | 13.7 (12.3, 15.9) | 13.4 (12.3, 15.1) | -1.051 | 0.293 |
| INR | 1.2 (1.1, 1.4) | 1.2 (1.1, 1.3) | -0.904 | 0.366 |
| APTT (s) | 32.0 (28.4, 35.2) | 30.7 (28.0, 34.4) | -1.194 | 0.232 |
| TT(s) | 19.2 (17.6, 21.7) | 19.2 (17.7, 21.2) | -0.189 | 0.850 |
| D-dimer (ng/ml) | 1422.5 (669.0, 3572.0) | 1064.0 (556.0, 2626.0) | -2.259 | 0.024 |
| Myocardial markers |  |  |  |  |
| cTNI (μg/L) | 0.03 (0.01, 0.12) | 0.04 (0.01, 0.11) | -0.844 | 0.399 |
| CK-MB (ng/ml) | 1.3 (0.6, 3.6) | 1.7 (0.7, 3.8) | -0.616 | 0.538 |
| Myoglobin (ug/L) | 129.5 (52.7, 394.1) | 139.6 (58.4, 412.0) | -0.479 | 0.632 |
| NT-proBNP (ng/L) | 1930.0 (463.3, 9800.0) | 1910.0 (462.0, 6230.0) | -0.029 | 0.977 |
| Inflammatory markers |  |  |  |  |
| CRP (mg/L) | 88.8 (51.3, 90.0) | 86.0 (48.3, 90.0) | -0.515 | 0.607 |
| Log IL-6 | 155.5 (51.6, 1131.5) | 179.0 (49.1, 665.0) | -0.354 | 0.724 |
| Procalcitonin (ng/ml) | 3.6 (0.7, 22.2) | 4.4 (0.6, 22.4) | -0.190 | 0.849 |
| SAA (mg/L) | 237.3 (108.7, 267.0) | 234.5 (92.5, 266.9) | -0.346 | 0.729 |
| Cardiac function parameters |  |  |  |  |
| LVEF (%) | 61.0 (58.8, 62.4) | 61.9 (58.0, 63.3) | -1.030 | 0.303 |
| LVESV (ml) | 32.0 (30.3, 34.0) | 32.0 (30.0, 34.0) | -0.977 | 0.328 |
| LVEDV (ml) | 48.0 (46.0, 50.0) | 48.0 (45.0, 50.0) | -1.044 | 0.296 |
| SOFA = sequential organ Failure assessment, APACHE-Ⅱ= acute physiology and chronic health evaluation Ⅱ, GCS = Glasgow Coma Scale, MV=mechanical ventilation, MAP = mean arterial pressure, Ph= pondus hydrogenii, PaCO2 = partial pressure of carbon dioxide, PaO2= partial pressure of oxygen in arterial blood, SBE = standard base excess, BUN=blood urea nitrogen, WBC = white blood cell count, ANC = absolute neutrophil count, ALC = absolute lymphocyte count, AMC=absolute monocyte count, RBC = red blood cell count, PT = prothrombin time, INR = international normalized ratio, APTT = activated partial thromboplastin time, TT = thrombin time, cTnI = cardiac troponin I, CK-MB = creatine kinase isoenzyme MB, Myo = myoglobin, BNP = B-type natriuretic peptide, CRP = c-reactive protein, IL-6 = interleukin-6, SAA = serum amyloid A, LVEF= left ventricular ejection fraction, LVESV=left ventricular end-systolic volume, LVEDV=left ventricular end-diastolic volume | | | | |
